# Supplementary material for: Additive and interactive cumulative effects on boreal landbirds: winners and losers in a multi‐stressor landscape
Source: PubMed Central journal article supplement — Ecol Appl. 2019 May 23;29(5):e01895. doi: 10.1002/eap.1895 (PMC6852527; doi:10.1002/eap.1895), 2019-05-23
Supplement: EAP-29-na-s002.pdf [file EAP-29-na-s002.pdf]

**Supporting Information.** C. Lisa Mahon, Gillian L. Holloway, Erin M. Bayne, and Judith D. Toms. 2019. Additive and interactive cumulative effects on boreal landbirds: winners and losers in a multi-stressor landscape. *Ecological Applications*.

## Appendix S2

Table S1. Model coefficients for the best environmental and disturbance model(s) for 27 landbird species in the Athabasca Oil Sands Area. Generalized Additive Models were a combination of linear terms and spline terms with a negative binominal distribution. Each model includes up to 8 environmental variables, plus additional disturbance variables. For the spline terms the effective degrees of freedom (EDF) is an approximation of the degrees of freedom implemented for the spline term in the model. Fields that are not applicable for a given model term are indicated using --.

| Species          | Best Model | Model Term               | Variable Type | Model Distribution | Coefficient (±SE) | Z/F Test | p-value | EDF |
|------------------|------------|--------------------------|---------------|--------------------|-------------------|----------|---------|-----|
| Alder Flycatcher | 4a         | (Intercept)              | --            | Linear Term        | -3.924 (1.194)    | -3.285   | 0.001   | --  |
|                  |            | Open Non-forest          | Environmental | Linear Term        | 0.241 (0.064)     | 3.772    | <0.001  | --  |
|                  |            | Hardwood                 | Environmental | Linear Term        | -0.01 (0.007)     | -1.457   | 0.146   | --  |
|                  |            | Upland Black Spruce/Pine | Environmental | Linear Term        | -0.145 (0.062)    | -2.350   | 0.019   | --  |
|                  |            | Total Cluster Area       | Environmental | Linear Term        | 0.003 (0.005)     | 0.594    | 0.553   | --  |
|                  |            | Black Spruce Lowlands    | Environmental | Linear Term        | 0.074 (0.058)     | 1.293    | 0.197   | --  |
|                  |            | Harvest Unit             | Disturbance   | Linear Term        | 0.296 (0.061)     | 4.836    | <0.001  | --  |
|                  | All Linear | Disturbance              | Linear Term   | 0.066 (0.147)      | 0.446             | 0.656    | --      |     |
| American Robin   | 4b         | (Intercept)              | --            | Linear Term        | 12.49 (7.78)      | 1.605    | 0.109   | --  |

|                         |    |                          |               |                  |                 |        |        |      |
|-------------------------|----|--------------------------|---------------|------------------|-----------------|--------|--------|------|
|                         |    | JDATE                    | Environmental | Linear Term      | -0.017 (0.007)  | -2.520 | 0.012  | --   |
|                         |    | Latitude                 | Environmental | Linear Term      | -0.189 (0.138)  | -1.362 | 0.174  | --   |
|                         |    | Black Spruce Lowlands    | Environmental | Linear Term      | -0.141 (0.053)  | -2.632 | 0.009  | --   |
|                         |    | White Spruce             | Environmental | Linear Term      | -0.073 (0.062)  | -1.166 | 0.245  | --   |
|                         |    | Total Cluster Area       | Environmental | Linear Term      | -0.011 (0.004)  | -2.597 | 0.010  | --   |
|                         |    | Upland Black Spruce/Pine | Environmental | Linear Term      | -0.126 (0.054)  | -2.318 | 0.021  | --   |
|                         |    | Spline - Age             | Environmental | GAM Spline Term  | --              | 3.701  | 0.055  | 1.00 |
|                         |    | Spline - Hardwood        | Environmental | GAM Spline Term  | --              | 3.080  | 0.037  | 2.07 |
|                         |    | Harvest Unit             | Disturbance   | Linear Term      | 0.399 (0.119)   | 3.362  | 0.001  | --   |
|                         |    | All Linear               | Disturbance   | Linear Term      | 0.439 (0.143)   | 3.066  | 0.002  | --   |
|                         |    | Harvest Unit:All Linear  | Disturbance   | Interaction Term | -0.158 (0.062)  | -2.543 | 0.012  | --   |
| Bay-breasted Warbler    | 3a | (Intercept)              | --            | Linear Term      | -4.772 (0.6)    | -7.948 | <0.001 | --   |
|                         |    | Open Non-forest          | Environmental | Linear Term      | -0.12 (0.072)   | -1.673 | 0.095  | --   |
|                         |    | Hardwood                 | Environmental | Linear Term      | 0.027 (0.005)   | 5.720  | <0.001 | --   |
|                         |    | Black Spruce Lowlands    | Environmental | Linear Term      | 0.2 (0.053)     | 3.786  | <0.001 | --   |
|                         |    | White Spruce             | Environmental | Linear Term      | 0.304 (0.05)    | 6.067  | <0.001 | --   |
|                         |    | Spline - Latitude        | Environmental | GAM Spline Term  | --              | 5.246  | 0.002  | 2.47 |
|                         |    | Well                     | Disturbance   | Linear Term      | -0.263 (0.158)  | -1.658 | 0.098  | --   |
|                         |    | Wide Linear              | Disturbance   | Linear Term      | 0.306 (0.102)   | 3.012  | 0.003  | --   |
|                         |    | Narrow Linear            | Disturbance   | Linear Term      | -0.045 (0.196)  | -0.230 | 0.818  | --   |
| Black-and-white Warbler | 1a | (Intercept)              | --            | Linear Term      | -3.923 (10.424) | -0.376 | 0.707  | --   |
|                         |    | Age                      | Environmental | Linear Term      | -0.02 (0.004)   | -4.628 | <0.001 | --   |
|                         |    | JDATE                    | Environmental | Linear Term      | -0.02 (0.008)   | -2.622 | 0.009  | --   |
|                         |    | Latitude                 | Environmental | Linear Term      | 0.449 (0.12)    | 3.738  | <0.001 | --   |
|                         |    | Longitude                | Environmental | Linear Term      | 0.171 (0.072)   | 2.371  | 0.018  | --   |
|                         |    | White Spruce             | Environmental | Linear Term      | 0.14 (0.056)    | 2.517  | 0.012  | --   |
|                         |    | Upland Black Spruce/Pine | Environmental | Linear Term      | -0.144 (0.057)  | -2.546 | 0.011  | --   |
|                         |    | Spline - Hardwood        | Environmental | GAM Spline Term  | --              | 10.083 | <0.001 | 2.91 |
| Black-capped Chickadee  | 3c | (Intercept)              | --            | Linear Term      | 3.606 (7.383)   | 0.488  | 0.626  | --   |
|                         |    | Age                      | Environmental | Linear Term      | 0.012 (0.003)   | 3.587  | <0.001 | --   |
|                         |    | Latitude                 | Environmental | Linear Term      | -0.148 (0.13)   | -1.140 | 0.255  | --   |
|                         |    | Black Spruce Lowlands    | Environmental | Linear Term      | -0.108 (0.046)  | -2.366 | 0.019  | --   |
|                         |    | Spline - Hardwood        | Environmental | GAM Spline Term  | --              | 10.140 | <0.001 | 2.09 |
|                         |    | Well                     | Disturbance   | Linear Term      | 2.213 (0.767)   | 2.884  | 0.004  | --   |
|                         |    | Wide Linear              | Disturbance   | Linear Term      | 1.147 (0.333)   | 3.447  | 0.001  | --   |
|                         |    | Narrow Linear            | Disturbance   | Linear Term      | 0.804 (0.389)   | 2.069  | 0.039  | --   |

|                  |    |                                |               |                  |                |        |        |      |
|------------------|----|--------------------------------|---------------|------------------|----------------|--------|--------|------|
|                  |    | Well:Wide Linear               | Disturbance   | Interaction Term | -1.247 (0.381) | -3.271 | 0.001  | --   |
|                  |    | Well:Narrow Linear             | Disturbance   | Interaction Term | -1.783 (0.683) | -2.610 | 0.010  | --   |
|                  |    | Wide Linear:Narrow Linear      | Disturbance   | Interaction Term | -0.854 (0.313) | -2.729 | 0.007  | --   |
|                  |    | Well:Wide Linear:Narrow Linear | Disturbance   | Interaction Term | 0.977 (0.306)  | 3.191  | 0.002  | --   |
| Boreal Chickadee | 6a | (Intercept)                    | --            | Linear Term      | -9.311 (7.698) | -1.210 | 0.227  | --   |
|                  |    | Latitude                       | Environmental | Linear Term      | 0.164 (0.135)  | 1.213  | 0.226  | --   |
|                  |    | Total Cluster Area             | Environmental | Linear Term      | -0.008 (0.004) | -1.942 | 0.053  | --   |
|                  |    | Spline - Age                   | Environmental | GAM Spline Term  | --             | 4.944  | 0.005  | 2.03 |
|                  |    | Spline - Hardwood              | Environmental | GAM Spline Term  | --             | 4.732  | 0.005  | 2.18 |
|                  |    | All Disturbance                | Disturbance   | Linear Term      | -0.133 (0.063) | -2.099 | 0.037  | --   |
| Boreal Chickadee | 4a | (Intercept)                    | --            | Linear Term      | -8.667 (8.047) | -1.077 | 0.282  | --   |
|                  |    | Latitude                       | Environmental | Linear Term      | 0.148 (0.14)   | 1.057  | 0.291  | --   |
|                  |    | Total Cluster Area             | Environmental | Linear Term      | -0.008 (0.004) | -1.796 | 0.074  | --   |
|                  |    | Spline - Age                   | Environmental | GAM Spline Term  | --             | 4.914  | 0.005  | 2.01 |
|                  |    | Spline - Hardwood              | Environmental | GAM Spline Term  | --             | 5.021  | 0.004  | 2.20 |
|                  |    | Harvest Unit                   | Disturbance   | Linear Term      | -0.138 (0.057) | -2.436 | 0.015  | --   |
|                  |    | All Linear                     | Disturbance   | Linear Term      | -0.063 (0.122) | -0.514 | 0.608  | --   |
| Canada Jay       | 3a | (Intercept)                    | --            | Linear Term      | -0.82 (0.905)  | -0.906 | 0.366  | --   |
|                  |    | Age                            | Environmental | Linear Term      | 0.005 (0.002)  | 2.298  | 0.022  | --   |
|                  |    | Open Non-forest                | Environmental | Linear Term      | 0.074 (0.033)  | 2.231  | 0.026  | --   |
|                  |    | JDATE                          | Environmental | Linear Term      | -0.004 (0.004) | -0.980 | 0.328  | --   |
|                  |    | Black Spruce Lowlands          | Environmental | Linear Term      | 0.123 (0.023)  | 5.242  | <0.001 | --   |
|                  |    | Total Cluster Area             | Environmental | Linear Term      | -0.006 (0.002) | -2.630 | 0.009  | --   |
|                  |    | Upland Black Spruce/Pine       | Environmental | Linear Term      | 0.056 (0.025)  | 2.231  | 0.026  | --   |
|                  |    | Spline - Hardwood              | Environmental | GAM Spline Term  | --             | 8.346  | <0.001 | 2.16 |
|                  |    | Well                           | Disturbance   | Linear Term      | 0.249 (0.073)  | 3.419  | 0.001  | --   |
|                  |    | Wide Linear                    | Disturbance   | Linear Term      | -0.013 (0.055) | -0.239 | 0.811  | --   |
|                  |    | Narrow Linear                  | Disturbance   | Linear Term      | -0.445 (0.105) | -4.228 | <0.001 | --   |
| Cape May Warbler | 1a | (Intercept)                    | --            | Linear Term      | 35.163 (9.309) | 3.777  | <0.001 | --   |
|                  |    | Age                            | Environmental | Linear Term      | 0.013 (0.005)  | 2.500  | 0.013  | --   |
|                  |    | JDATE                          | Environmental | Linear Term      | -0.023 (0.008) | -2.855 | 0.005  | --   |
|                  |    | Longitude                      | Environmental | Linear Term      | 0.314 (0.083)  | 3.794  | <0.001 | --   |
|                  |    | Black Spruce Lowlands          | Environmental | Linear Term      | 0.343 (0.069)  | 4.962  | <0.001 | --   |
|                  |    | White Spruce                   | Environmental | Linear Term      | 0.502 (0.075)  | 6.647  | <0.001 | --   |
|                  |    | Total Cluster Area             | Environmental | Linear Term      | -0.014 (0.005) | -2.845 | 0.005  | --   |

|                  |    |                                |               |                  |                |        |        |      |
|------------------|----|--------------------------------|---------------|------------------|----------------|--------|--------|------|
|                  |    | Upland Black Spruce/Pine       | Environmental | Linear Term      | 0.219 (0.069)  | 3.149  | 0.002  | --   |
|                  |    | Spline - Hardwood              | Environmental | GAM Spline Term  | --             | 8.761  | <0.001 | 2.62 |
|                  |    | Spline - Latitude              | Environmental | GAM Spline Term  | --             | 5.459  | 0.001  | 2.80 |
| Chipping Sparrow | 6a | (Intercept)                    | --            | Linear Term      | -4.068 (3.59)  | -1.133 | 0.258  | --   |
|                  |    | Latitude                       | Environmental | Linear Term      | 0.054 (0.064)  | 0.853  | 0.394  | --   |
|                  |    | White Spruce                   | Environmental | Linear Term      | -0.042 (0.02)  | -2.117 | 0.035  | --   |
|                  |    | Spline - Hardwood              | Environmental | GAM Spline Term  | --             | 18.636 | <0.001 | 2.54 |
|                  |    | All Disturbance                | Disturbance   | Linear Term      | -0.068 (0.027) | -2.551 | 0.011  | --   |
| Chipping Sparrow | 4a | (Intercept)                    | --            | Linear Term      | -2.41 (3.79)   | -0.636 | 0.525  | --   |
|                  |    | Latitude                       | Environmental | Linear Term      | 0.026 (0.067)  | 0.387  | 0.699  | --   |
|                  |    | White Spruce                   | Environmental | Linear Term      | -0.045 (0.021) | -2.179 | 0.030  | --   |
|                  |    | Spline - Hardwood              | Environmental | GAM Spline Term  | --             | 18.615 | <0.001 | 2.54 |
|                  |    | Harvest Unit                   | Disturbance   | Linear Term      | -0.05 (0.023)  | -2.201 | 0.029  | --   |
|                  |    | All Linear                     | Disturbance   | Linear Term      | -0.108 (0.062) | -1.743 | 0.082  | --   |
| Common Raven     | 3c | (Intercept)                    | --            | Linear Term      | 33.645 (9.038) | 3.723  | <0.001 | --   |
|                  |    | Hardwood                       | Environmental | Linear Term      | -0.007 (0.004) | -1.875 | 0.062  | --   |
|                  |    | JDATE                          | Environmental | Linear Term      | -0.006 (0.007) | -0.898 | 0.370  | --   |
|                  |    | Latitude                       | Environmental | Linear Term      | -0.655 (0.161) | -4.062 | <0.001 | --   |
|                  |    | Spline - Longitude             | Environmental | GAM Spline Term  | --             | 4.519  | 0.004  | 2.77 |
|                  |    | Well                           | Disturbance   | Linear Term      | 2.066 (0.684)  | 3.020  | 0.003  | --   |
|                  |    | Wide Linear                    | Disturbance   | Linear Term      | -0.567 (0.412) | -1.377 | 0.169  | --   |
|                  |    | Narrow Linear                  | Disturbance   | Linear Term      | 0.04 (0.393)   | 0.101  | 0.920  | --   |
|                  |    | Well:Wide Linear               | Disturbance   | Interaction Term | -0.274 (0.384) | -0.714 | 0.476  | --   |
|                  |    | Well:Narrow Linear             | Disturbance   | Interaction Term | -1.606 (0.562) | -2.857 | 0.005  | --   |
|                  |    | Wide Linear:Narrow Linear      | Disturbance   | Interaction Term | 0.456 (0.365)  | 1.251  | 0.212  | --   |
|                  |    | Well:Wide Linear:Narrow Linear | Disturbance   | Interaction Term | 0.356 (0.284)  | 1.256  | 0.210  | --   |
| Dark-eyed Junco  | 4b | (Intercept)                    | --            | Linear Term      | -11.871 (6.31) | -1.881 | 0.061  | --   |
|                  |    | Hardwood                       | Environmental | Linear Term      | -0.026 (0.004) | -6.651 | <0.001 | --   |
|                  |    | Black Spruce Lowlands          | Environmental | Linear Term      | 0.1 (0.033)    | 3.019  | 0.003  | --   |
|                  |    | Total Cluster Area             | Environmental | Linear Term      | -0.007 (0.003) | -2.035 | 0.043  | --   |
|                  |    | Upland Black Spruce/Pine       | Environmental | Linear Term      | 0.041 (0.035)  | 1.173  | 0.242  | --   |
|                  |    | JDATE                          | Environmental | Linear Term      | 0.01 (0.005)   | 1.924  | 0.055  | --   |
|                  |    | Latitude                       | Environmental | Linear Term      | 0.173 (0.111)  | 1.564  | 0.119  | --   |
|                  |    | Harvest Unit                   | Disturbance   | Linear Term      | 0.052 (0.12)   | 0.437  | 0.662  | --   |

|                   |    |                          |               |                  |                  |        |        |      |
|-------------------|----|--------------------------|---------------|------------------|------------------|--------|--------|------|
|                   |    | All Linear               | Disturbance   | Linear Term      | 0.215 (0.105)    | 2.051  | 0.041  | --   |
|                   |    | Harvest Unit:All Linear  | Disturbance   | Interaction Term | -0.113 (0.066)   | -1.698 | 0.091  | --   |
| Hermit Thrush     | 5b | (Intercept)              | --            | Linear Term      | 0.05 (4.492)     | 0.011  | 0.991  | --   |
|                   |    | Open Non-forest          | Environmental | Linear Term      | 0.175 (0.034)    | 5.160  | <0.001 | --   |
|                   |    | Latitude                 | Environmental | Linear Term      | -0.067 (0.079)   | -0.847 | 0.398  | --   |
|                   |    | Black Spruce Lowlands    | Environmental | Linear Term      | 0.135 (0.023)    | 5.946  | <0.001 | --   |
|                   |    | Upland Black Spruce/Pine | Environmental | Linear Term      | 0.1 (0.022)      | 4.644  | <0.001 | --   |
|                   |    | Spline - Age             | Environmental | GAM Spline Term  | --               | 7.797  | <0.001 | 1.87 |
|                   |    | Harvest Unit             | Disturbance   | Linear Term      | 0.012 (0.084)    | 0.138  | 0.891  | --   |
|                   |    | Well                     | Disturbance   | Linear Term      | -0.126 (0.088)   | -1.429 | 0.154  | --   |
|                   |    | All Linear               | Disturbance   | Linear Term      | 0.26 (0.091)     | 2.853  | 0.005  | --   |
|                   |    | Harvest Unit:All Linear  | Disturbance   | Interaction Term | -0.069 (0.048)   | -1.433 | 0.153  | --   |
|                   |    | Harvest Unit:Well        | Disturbance   | Interaction Term | 0.115 (0.046)    | 2.506  | 0.013  | --   |
| Least Flycatcher  | 1a | (Intercept)              | --            | Linear Term      | 1.359 (1.334)    | 1.019  | 0.309  | --   |
|                   |    | Hardwood                 | Environmental | Linear Term      | 0.014 (0.004)    | 3.224  | 0.001  | --   |
|                   |    | JDATE                    | Environmental | Linear Term      | -0.019 (0.007)   | -2.621 | 0.009  | --   |
|                   |    | Black Spruce Lowlands    | Environmental | Linear Term      | -0.241 (0.056)   | -4.283 | <0.001 | --   |
|                   |    | White Spruce             | Environmental | Linear Term      | -0.118 (0.054)   | -2.201 | 0.029  | --   |
|                   |    | Spline - Age             | Environmental | GAM Spline Term  | --               | 1.508  | 0.212  | 2.76 |
|                   |    | Spline - Latitude        | Environmental | GAM Spline Term  | --               | 1.830  | 0.150  | 2.06 |
| Lincoln's Sparrow | 5b | (Intercept)              | --            | Linear Term      | -15.979 (11.815) | -1.352 | 0.177  | --   |
|                   |    | Hardwood                 | Environmental | Linear Term      | -0.032 (0.005)   | -6.615 | <0.001 | --   |
|                   |    | Upland Black Spruce/Pine | Environmental | Linear Term      | -0.219 (0.053)   | -4.169 | <0.001 | --   |
|                   |    | White Spruce             | Environmental | Linear Term      | -0.188 (0.048)   | -3.919 | <0.001 | --   |
|                   |    | Longitude                | Environmental | Linear Term      | -0.266 (0.083)   | -3.211 | 0.001  | --   |
|                   |    | Latitude                 | Environmental | Linear Term      | -0.247 (0.155)   | -1.598 | 0.111  | --   |
|                   |    | Harvest Unit             | Disturbance   | Linear Term      | -0.034 (0.139)   | -0.244 | 0.807  | --   |
|                   |    | Well                     | Disturbance   | Linear Term      | 0.317 (0.183)    | 1.736  | 0.084  | --   |
|                   |    | All Linear               | Disturbance   | Linear Term      | -0.431 (0.188)   | -2.292 | 0.023  | --   |
|                   |    | Harvest Unit:All Linear  | Disturbance   | Interaction Term | 0.134 (0.084)    | 1.595  | 0.112  | --   |
|                   |    | Harvest Unit:Well        | Disturbance   | Interaction Term | -0.165 (0.084)   | -1.973 | 0.049  | --   |
| Magnolia Warbler  | 1a | (Intercept)              | --            | Linear Term      | -1.341 (0.162)   | -8.303 | <0.001 | --   |
|                   |    | Black Spruce Lowlands    | Environmental | Linear Term      | -0.072 (0.034)   | -2.121 | 0.035  | --   |
|                   |    | Upland Black Spruce/Pine | Environmental | Linear Term      | -0.061 (0.034)   | -1.792 | 0.074  | --   |
|                   |    | Spline - Age             | Environmental | GAM Spline Term  | --               | 3.603  | 0.015  | 2.66 |

|                  |    |                          |               |                  |                 |        |        |      |
|------------------|----|--------------------------|---------------|------------------|-----------------|--------|--------|------|
|                  |    | Spline - Hardwood        | Environmental | GAM Spline Term  | --              | 7.589  | <0.001 | 2.26 |
| Mourning Warbler | 2a | (Intercept)              | --            | Linear Term      | 32.486 (13.716) | 2.368  | 0.019  | --   |
|                  |    | Age                      | Environmental | Linear Term      | 0.019 (0.004)   | 4.310  | <0.001 | --   |
|                  |    | JDATE                    | Environmental | Linear Term      | 0.031 (0.007)   | 4.192  | <0.001 | --   |
|                  |    | Latitude                 | Environmental | Linear Term      | -0.367 (0.167)  | -2.200 | 0.029  | --   |
|                  |    | Longitude                | Environmental | Linear Term      | 0.18 (0.09)     | 2.002  | 0.046  | --   |
|                  |    | Black Spruce Lowlands    | Environmental | Linear Term      | -0.23 (0.057)   | -4.013 | <0.001 | --   |
|                  |    | Upland Black Spruce/Pine | Environmental | Linear Term      | -0.235 (0.064)  | -3.686 | <0.001 | --   |
|                  |    | Spline - Hardwood        | Environmental | GAM Spline Term  | --              | 9.419  | <0.001 | 2.91 |
|                  |    | Wide Linear              | Disturbance   | Linear Term      | 0.1 (0.125)     | 0.807  | 0.421  | --   |
|                  |    | Narrow Linear            | Disturbance   | Linear Term      | -0.498 (0.292)  | -1.705 | 0.089  | --   |
| Northern Flicker | 4a | (Intercept)              | --            | Linear Term      | 27.108 (9.614)  | 2.820  | 0.005  | --   |
|                  |    | Longitude                | Environmental | Linear Term      | 0.226 (0.087)   | 2.584  | 0.010  | --   |
|                  |    | Hardwood                 | Environmental | Linear Term      | -0.014 (0.005)  | -2.860 | 0.005  | --   |
|                  |    | Age                      | Environmental | Linear Term      | -0.012 (0.004)  | -2.916 | 0.004  | --   |
|                  |    | Total Cluster Area       | Environmental | Linear Term      | -0.012 (0.005)  | -2.425 | 0.016  | --   |
|                  |    | Black Spruce Lowlands    | Environmental | Linear Term      | -0.049 (0.049)  | -1.004 | 0.316  | --   |
|                  |    | JDATE                    | Environmental | Linear Term      | -0.013 (0.008)  | -1.651 | 0.100  | --   |
|                  |    | Harvest Unit             | Disturbance   | Linear Term      | 0.11 (0.05)     | 2.199  | 0.029  | --   |
|                  |    | All Linear               | Disturbance   | Linear Term      | 0.094 (0.134)   | 0.702  | 0.483  | --   |
| Ovenbird         | 3b | (Intercept)              | --            | Linear Term      | 11.11 (3.855)   | 2.882  | 0.004  | --   |
|                  |    | Age                      | Environmental | Linear Term      | -0.002 (0.002)  | -1.141 | 0.255  | --   |
|                  |    | Open Non-forest          | Environmental | Linear Term      | -0.061 (0.031)  | -1.964 | 0.051  | --   |
|                  |    | JDATE                    | Environmental | Linear Term      | -0.004 (0.003)  | -1.434 | 0.153  | --   |
|                  |    | Longitude                | Environmental | Linear Term      | 0.101 (0.034)   | 2.948  | 0.003  | --   |
|                  |    | Black Spruce Lowlands    | Environmental | Linear Term      | -0.062 (0.021)  | -3.013 | 0.003  | --   |
|                  |    | Upland Black Spruce/Pine | Environmental | Linear Term      | -0.038 (0.022)  | -1.705 | 0.089  | --   |
|                  |    | Spline - Hardwood        | Environmental | GAM Spline Term  | --              | 60.059 | <0.001 | 2.86 |
|                  |    | Spline - Latitude        | Environmental | GAM Spline Term  | --              | 5.462  | 0.001  | 2.86 |
|                  |    | Well                     | Disturbance   | Linear Term      | 0.418 (0.178)   | 2.349  | 0.020  | --   |
|                  |    | Wide Linear              | Disturbance   | Linear Term      | 0.159 (0.069)   | 2.307  | 0.022  | --   |
|                  |    | Narrow Linear            | Disturbance   | Linear Term      | 0.09 (0.135)    | 0.666  | 0.506  | --   |
|                  |    | Well:Wide Linear         | Disturbance   | Interaction Term | -0.07 (0.069)   | -1.020 | 0.309  | --   |
|                  |    | Well:Narrow Linear       | Disturbance   | Interaction Term | -0.333 (0.131)  | -2.550 | 0.011  | --   |
| Palm Warbler     | 1a | (Intercept)              | --            | Linear Term      | -4.08 (0.868)   | -4.700 | <0.001 | --   |
|                  |    | Hardwood                 | Environmental | Linear Term      | -0.014 (0.007)  | -1.969 | 0.050  | --   |

|                        |    |                              |               |                  |                |        |        |      |
|------------------------|----|------------------------------|---------------|------------------|----------------|--------|--------|------|
|                        |    | Black Spruce Lowlands        | Environmental | Linear Term      | 0.464 (0.067)  | 6.922  | <0.001 | --   |
|                        |    | Age                          | Environmental | Linear Term      | -0.018 (0.006) | -3.133 | 0.002  | --   |
|                        |    | Open Non-forest              | Environmental | Linear Term      | 0.313 (0.077)  | 4.060  | <0.001 | --   |
|                        |    | Upland Black Spruce/Pine     | Environmental | Linear Term      | 0.224 (0.067)  | 3.340  | 0.001  | --   |
|                        |    | White Spruce                 | Environmental | Linear Term      | 0.151 (0.072)  | 2.091  | 0.037  | --   |
| Red-breasted Nuthatch  | 2b | (Intercept)                  | --            | Linear Term      | 19.033 (6.824) | 2.789  | 0.006  | --   |
|                        |    | JDATE                        | Environmental | Linear Term      | -0.007 (0.006) | -1.306 | 0.193  | --   |
|                        |    | Latitude                     | Environmental | Linear Term      | -0.377 (0.122) | -3.081 | 0.002  | --   |
|                        |    | Black Spruce Lowlands        | Environmental | Linear Term      | -0.055 (0.039) | -1.411 | 0.159  | --   |
|                        |    | White Spruce                 | Environmental | Linear Term      | 0.189 (0.04)   | 4.758  | <0.001 | --   |
|                        |    | Spline - Age                 | Environmental | GAM Spline Term  | --             | 5.112  | 0.004  | 2.16 |
|                        |    | Wide Linear                  | Disturbance   | Linear Term      | -0.167 (0.2)   | -0.834 | 0.405  | --   |
|                        |    | Narrow Linear                | Disturbance   | Linear Term      | -0.573 (0.257) | -2.229 | 0.027  | --   |
|                        |    | Wide Linear:Narrow Linear    | Disturbance   | Interaction Term | 0.277 (0.176)  | 1.574  | 0.117  | --   |
| Red-eyed Vireo         | 5c | (Intercept)                  | --            | Linear Term      | 0.173 (5.268)  | 0.033  | 0.974  | --   |
|                        |    | Age                          | Environmental | Linear Term      | -0.004 (0.003) | -1.414 | 0.158  | --   |
|                        |    | JDATE                        | Environmental | Linear Term      | 0.011 (0.005)  | 2.366  | 0.019  | --   |
|                        |    | Latitude                     | Environmental | Linear Term      | -0.097 (0.093) | -1.042 | 0.298  | --   |
|                        |    | Black Spruce Lowlands        | Environmental | Linear Term      | -0.115 (0.04)  | -2.842 | 0.005  | --   |
|                        |    | White Spruce                 | Environmental | Linear Term      | -0.108 (0.046) | -2.352 | 0.019  | --   |
|                        |    | Total Cluster Area           | Environmental | Linear Term      | 0.007 (0.003)  | 2.620  | 0.009  | --   |
|                        |    | Upland Black Spruce/Pine     | Environmental | Linear Term      | -0.123 (0.04)  | -3.100 | 0.002  | --   |
|                        |    | Spline - Hardwood            | Environmental | GAM Spline Term  | --             | 14.224 | <0.001 | 2.69 |
|                        |    | Harvest Unit                 | Disturbance   | Linear Term      | 0.369 (0.131)  | 2.805  | 0.005  | --   |
|                        |    | Well                         | Disturbance   | Linear Term      | 1.048 (0.281)  | 3.727  | <0.001 | --   |
|                        |    | All Linear                   | Disturbance   | Linear Term      | 0.669 (0.157)  | 4.246  | <0.001 | --   |
|                        |    | Harvest Unit:All Linear      | Disturbance   | Interaction Term | -0.165 (0.081) | -2.030 | 0.043  | --   |
|                        |    | Harvest Unit:Well            | Disturbance   | Interaction Term | -0.214 (0.188) | -1.139 | 0.256  | --   |
|                        |    | Well:All Linear              | Disturbance   | Interaction Term | -0.564 (0.148) | -3.812 | <0.001 | --   |
|                        |    | Harvest Unit:Well:All Linear | Disturbance   | Interaction Term | 0.125 (0.106)  | 1.185  | 0.237  | --   |
| Rose-breasted Grosbeak | 3b | (Intercept)                  | --            | Linear Term      | -0.135 (1.18)  | -0.115 | 0.909  | --   |
|                        |    | Age                          | Environmental | Linear Term      | -0.004 (0.003) | -1.130 | 0.259  | --   |
|                        |    | JDATE                        | Environmental | Linear Term      | -0.013 (0.006) | -2.088 | 0.038  | --   |
|                        |    | Black Spruce Lowlands        | Environmental | Linear Term      | -0.168 (0.042) | -3.980 | <0.001 | --   |
|                        |    | Upland Black Spruce/Pine     | Environmental | Linear Term      | -0.167 (0.047) | -3.587 | <0.001 | --   |
|                        |    | Spline - Hardwood            | Environmental | GAM Spline Term  | --             | 10.793 | <0.001 | 2.89 |

|                          |    |                          |               |                  |                |        |        |      |
|--------------------------|----|--------------------------|---------------|------------------|----------------|--------|--------|------|
|                          |    | Well                     | Disturbance   | Linear Term      | 1.067 (0.406)  | 2.631  | 0.009  | --   |
|                          |    | Wide Linear              | Disturbance   | Linear Term      | 0.201 (0.143)  | 1.401  | 0.162  | --   |
|                          |    | Narrow Linear            | Disturbance   | Linear Term      | 0.028 (0.285)  | 0.097  | 0.923  | --   |
|                          |    | Well:Wide Linear         | Disturbance   | Interaction Term | -0.193 (0.142) | -1.365 | 0.173  | --   |
|                          |    | Well:Narrow Linear       | Disturbance   | Interaction Term | -0.52 (0.319)  | -1.633 | 0.104  | --   |
| Ruby-crowned Kinglet     | 1a | (Intercept)              | --            | Interaction Term | 10.459 (4.726) | 2.213  | 0.028  | --   |
|                          |    | Open Non-forest          | Environmental | Linear Term      | 0.119 (0.042)  | 2.859  | 0.005  | --   |
|                          |    | JDATE                    | Environmental | Linear Term      | -0.03 (0.005)  | -6.551 | <0.001 | --   |
|                          |    | Latitude                 | Environmental | Linear Term      | -0.15 (0.085)  | -1.771 | 0.078  | --   |
|                          |    | Black Spruce Lowlands    | Environmental | Linear Term      | 0.327 (0.027)  | 11.926 | <0.001 | --   |
|                          |    | White Spruce             | Environmental | Linear Term      | 0.129 (0.036)  | 3.590  | <0.001 | --   |
|                          |    | Total Cluster Area       | Environmental | Linear Term      | -0.01 (0.003)  | -3.769 | <0.001 | --   |
|                          |    | Upland Black Spruce/Pine | Environmental | Linear Term      | 0.252 (0.027)  | 9.213  | <0.001 | --   |
|                          |    | Spline - Age             | Environmental | GAM Spline Term  | --             | 4.397  | 0.006  | 2.51 |
|                          |    | Spline - Longitude       | Environmental | GAM Spline Term  | --             | 4.650  | 0.004  | 2.64 |
| White-throated Sparrow   | 4a | (Intercept)              | --            | Linear Term      | 12.275 (3.777) | 3.250  | 0.001  | --   |
|                          |    | Longitude                | Environmental | Linear Term      | 0.107 (0.034)  | 3.117  | 0.002  | --   |
|                          |    | Black Spruce Lowlands    | Environmental | Linear Term      | -0.099 (0.023) | -4.253 | <0.001 | --   |
|                          |    | White Spruce             | Environmental | Linear Term      | -0.05 (0.023)  | -2.172 | 0.031  | --   |
|                          |    | Total Cluster Area       | Environmental | Linear Term      | -0.003 (0.002) | -1.797 | 0.073  | --   |
|                          |    | Upland Black Spruce/Pine | Environmental | Linear Term      | -0.119 (0.024) | -4.974 | <0.001 | --   |
|                          |    | Spline - Hardwood        | Environmental | GAM Spline Term  | --             | 1.130  | 0.305  | 1.42 |
|                          |    | Harvest Unit             | Disturbance   | Linear Term      | 0.091 (0.024)  | 3.813  | <0.001 | --   |
|                          |    | All Linear               | Disturbance   | Linear Term      | -0.134 (0.057) | -2.361 | 0.019  | --   |
| Winter Wren              | 1a | (Intercept)              | --            | Linear Term      | -5.284 (0.752) | -7.027 | <0.001 | --   |
|                          |    | Age                      | Environmental | Linear Term      | 0.011 (0.003)  | 4.243  | <0.001 | --   |
|                          |    | JDATE                    | Environmental | Linear Term      | 0.007 (0.004)  | 1.734  | 0.084  | --   |
|                          |    | Black Spruce Lowlands    | Environmental | Linear Term      | -0.06 (0.033)  | -1.824 | 0.069  | --   |
|                          |    | White Spruce             | Environmental | Linear Term      | 0.145 (0.033)  | 4.338  | <0.001 | --   |
|                          |    | Spline - Hardwood        | Environmental | GAM Spline Term  | --             | 2.165  | 0.103  | 2.06 |
|                          |    | Spline - Latitude        | Environmental | GAM Spline Term  | --             | 11.192 | <0.001 | 2.66 |
| Yellow-bellied Sapsucker | 3b | (Intercept)              | --            | Linear Term      | 15.177 (7.39)  | 2.054  | 0.041  | --   |
|                          |    | JDATE                    | Environmental | Linear Term      | 0.016 (0.005)  | 2.894  | 0.004  | --   |
|                          |    | Longitude                | Environmental | Linear Term      | 0.183 (0.066)  | 2.751  | 0.006  | --   |
|                          |    | Black Spruce Lowlands    | Environmental | Linear Term      | -0.144 (0.042) | -3.409 | 0.001  | --   |



|                       |    |                          |               |                  |                |        |        |    |
|-----------------------|----|--------------------------|---------------|------------------|----------------|--------|--------|----|
|                       |    | White Spruce             | Environmental | Linear Term      | 0.079 (0.041)  | 1.928  | 0.055  | -- |
|                       |    | Spline - Hardwood        | Environmental | GAM Spline Term  | --             | 6.233  | 0.001  | -- |
|                       |    | Well                     | Disturbance   | Linear Term      | 1.023 (0.406)  | 2.521  | 0.012  | -- |
|                       |    | Wide Linear              | Disturbance   | Linear Term      | 0.236 (0.135)  | 1.751  | 0.081  | -- |
|                       |    | Narrow Linear            | Disturbance   | Linear Term      | -0.165 (0.264) | -0.623 | 0.534  | -- |
|                       |    | Well:Wide Linear         | Disturbance   | Interaction Term | -0.328 (0.146) | -2.240 | 0.026  | -- |
|                       |    | Well:Narrow Linear       | Disturbance   | Interaction Term | -0.625 (0.329) | -1.903 | 0.058  | -- |
| Yellow-rumped Warbler | 4a | (Intercept)              | Environmental | Linear Term      | -0.26 (0.329)  | -0.79  | 0.431  | -- |
|                       |    | Black Spruce Lowlands    | Environmental | Linear Term      | 0.043 (0.014)  | 3.07   | 0.002  | -- |
|                       |    | Total Cluster Area       | Environmental | Linear Term      | -0.004 (0.002) | -2.36  | 0.019  | -- |
|                       |    | Upland Black Spruce/Pine | Environmental | Linear Term      | 0.102 (0.014)  | 7.31   | <0.001 | -- |
|                       |    | Spline - Latitude        | Environmental | GAM Spline Term  | --             | 12.403 | <0.001 | -- |
|                       |    | Spline - Longitude       | Environmental | GAM Spline Term  | --             | 21.649 | <0.001 | -- |
|                       |    | Harvest Unit             | Disturbance   | Linear Term      | -0.073 (0.019) | -3.81  | <0.001 | -- |
|                       |    | All Linear               | Disturbance   | Linear Term      | 0.04 (0.046)   | 0.87   | 0.384  | -- |
